# Supplementary material
Source: Copernicus journal article supplement (doi:10.5194/hess-30-3529-2026)
Supplement: Supplementary file 1 [file hess-30-3529-2026-supplement.pdf]

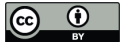

*Supplement of*

## **Projections of future hydrological drought in a reservoir-regulated region: the roles of climate change and reservoir operation**

**Shaokun He et al.**

*Correspondence to:* Keping Chen ([chenkb@whu.edu.cn](mailto:chenkb@whu.edu.cn)) and Yu Gong ([ygong@whu.edu.cn](mailto:ygong@whu.edu.cn))

The copyright of individual parts of the supplement might differ from the article licence.

### **S1. Hyper-parameter tuning process of LSTM**

Since the LSTM models were configured as a three-layer network and the input predictors were identified, the number of hidden nodes, the initial learning rate, and the dropout rate remained to be determined. To this end, a grid-search strategy was used. Specifically, we tested the number of hidden nodes {2, 3, 4, and 8}, the initial learning rate  $\{1 \times 10^{-4}, 1 \times 10^{-3}, \text{ and } 5 \times 10^{-3}\}$ , the dropout value {0, 0.1, 0.2, and 0.3}. For each configuration, five independent experiments were conducted and their average performance was compared, given the stochastic nature of LSTM simulations. The *NSE* results are summarized in Table S1. Most configurations achieved good performance in daily-scale hydrological simulations, and the differences among repeated experiments were relatively small, suggesting robust model behavior. After screening all configurations, experiment ID 66 was identified as the best performer. Specifically, the selected settings were 4 hidden nodes, an initial learning rate of  $1 \times 10^{-4}$ , and a dropout rate of 0.1 for both the inflow simulation and the operating policy derivation.

At the monthly scale, ID 66 achieved *NSE* values of 0.93 and 0.91 for reservoir inflow and release during the calibration period, respectively, with percent bias (*PBIAS*) values of 3.20% and 3.35%. During the validation period, the *NSE* values were 0.95 and 0.89, with *PBIAS* values of 0.29% and  $-3.35\%$ , respectively. Overall, these results indicate satisfactory performance across both inflow and release simulations, supporting the subsequent analyses in this study.

## S2. Optimization of reservoir operating policies

A multi-objective decision-making problem is formulated for the Ankang reservoir and two objectives are considered: hydropower generation (i.e., total energy generated by the reservoir over the simulation period in units of kWh) and power generation guarantee rate (i.e., the fraction of time periods over the simulation period during which the monthly average power output exceeds the guaranteed power). For medium- and long-term hydropower operations of reservoirs, these two objectives are commonly used to measure operational performance (Chen et al., 2019; Li et al., 2022; Si et al., 2018), which can be expressed by Equations (S1) and (S2).

$$\max f_{THP} = \sum_{t=1}^T \frac{P_t \cdot (\Delta t / 3600)}{Y}, \quad P_t = k \cdot H_t \cdot QG_t \quad (S1)$$

$$\max f_{PGR} = \sum_{t=1}^T \Lambda / T * 100\%, \quad \Lambda = \begin{cases} 0 & \text{if } P_t < P_{gua} \\ 1 & \text{else} \end{cases} \quad (S2)$$

where  $P_t$  (kW) is the electric power generated by the reservoir at time  $t$ ;  $k$  is the efficiency coefficient of the reservoir, which is assumed to be constant over time;  $H_t$  (m) is the hydraulic head at time  $t$ ;  $QG_t$  ( $m^3/s$ ) is the water release for hydropower generation at time  $t$ ;  $f_{THP}$  (kW·h) is the total hydropower production (i.e., annual average energy output);  $\Delta t$  (s) is the numerical discretization time step;  $Y$  is the total number of years in the simulation periods;  $T$  is the total number of time periods;  $f_{PGR}$  is the power generation guarantee rate;  $\Lambda$  is a Boolean variable (i.e., 0 or 1), which equals 0 when  $P_t$  is less than the guaranteed power and equals 1 otherwise.

Additionally, reservoir operation optimization should satisfy the following constraints:

$$V_{t+1} = V_t + (I_t - O_t) \cdot \Delta t \quad (S3)$$

$$V_{min} \leq V_t \leq V_{max} \quad (S4)$$

$$O_{min} \leq O_t \leq O_{max}, \quad O_t = QG_t + QS_t \quad (S5)$$

$$P_{min} \leq P_t \leq P_{max} \quad (S6)$$

where Equations (S3) - (S5) are the same as Equations (6) – (8) in the main text.  $QS_t$  ( $m^3/s$ ) is the spill flow at time  $t$ ;  $P_{min}$  (kW) and  $P_{max}$  (kW) are the allowable minimum and maximum power outputs, respectively.

We subsequently represent the operating policies with Gaussian radial basis functions (RBFs) due to their reported positive scalability with respect to the state-decision space (Yang et al., 2020; Quinn et al., 2017). The RBF-based policy representation is expressed in Equation (S7), where  $u_t$  is the policy-designated reservoir release at time  $t$  (normalized to  $[0, 1]$ ),  $(X_t)_m$  is the value of the  $m$ th of  $M$  time-varying inputs at time  $t$  (normalized to  $[0, 1]$ ), and  $w_k$ ,  $c_{k,m}$ , and  $b_k$  are the weights, centers, and radii of RBFs, respectively.

$$u_t = \sum_{k=1}^K w_k \exp \left[ -\sum_{m=1}^M \frac{((X_t)_m - c_{k,m})^2}{b_k} \right] \quad (S7)$$

where  $w_k \in [0,1]$  with  $\sum_{k=1}^K w_k = 1$ ,  $c_{k,m} \in [-1,1]$ , and  $b_{k,m} \in (0,1]$ . We modeled reservoir releases using three inputs: current reservoir storage, current reservoir inflow, and time of year, as suggested by Yang et al. (2017) for this reservoir system. Notably, the final true release at time  $t$  may not always be equal to the unnormalized policy-designated release at time  $t$  due to physical release constraints. If there is insufficient reservoir storage capacity to allow a release of only the unnormalized magnitude of  $u_t$ , the excess is spilled, and if there is less water than the unnormalized  $u_t$ , only the available water is released.

Finally, we used the nondominated sorting genetic algorithm II (NSGA-II) (Deb et al., 2002) to optimize the policy parameters. The population size and number of generations were set to 100 and 1000, respectively. The resulting Pareto front  $\pi_\theta^*$  is shown in Figure 10 in the main manuscript.

**Table S1.** The average *Nash-Sutcliffe (NSE)* performance of LSTM in the daily hydrological simulation with different hyper-parameter combinations.

| Experiment ID | Hidden_size | End_lr   | Hidden_channel | dropout | Calibration period (1993-2014) |         | Validation period (2015-2020) |         |
|---------------|-------------|----------|----------------|---------|--------------------------------|---------|-------------------------------|---------|
|               |             |          |                |         | Inflow                         | Release | Inflow                        | Release |
| 1             | 8           | 0.005    | 8              | 0       | 0.864                          | 0.802   | 0.736                         | 0.651   |
| 2             | 8           | 0.001    | 8              | 0       | 0.862                          | 0.797   | 0.733                         | 0.649   |
| 3             | 8           | 1.00E-04 | 8              | 0       | 0.862                          | 0.804   | 0.733                         | 0.64    |
| 4             | 8           | 0.005    | 8              | 0.1     | 0.857                          | 0.799   | 0.74                          | 0.659   |
| 5             | 8           | 0.001    | 8              | 0.1     | 0.855                          | 0.792   | 0.736                         | 0.656   |
| 6             | 8           | 1.00E-04 | 8              | 0.1     | 0.853                          | 0.785   | 0.735                         | 0.652   |
| 7             | 8           | 0.005    | 8              | 0.2     | 0.853                          | 0.79    | 0.741                         | 0.659   |
| 8             | 8           | 0.001    | 8              | 0.2     | 0.852                          | 0.785   | 0.741                         | 0.657   |
| 9             | 8           | 1.00E-04 | 8              | 0.2     | 0.853                          | 0.783   | 0.744                         | 0.657   |
| 10            | 8           | 0.005    | 8              | 0.3     | 0.851                          | 0.789   | 0.747                         | 0.661   |
| 11            | 8           | 0.001    | 8              | 0.3     | 0.851                          | 0.784   | 0.746                         | 0.658   |
| 12            | 8           | 1.00E-04 | 8              | 0.3     | 0.847                          | 0.782   | 0.741                         | 0.656   |
| 13            | 8           | 0.005    | 4              | 0       | 0.856                          | 0.805   | 0.729                         | 0.646   |
| 14            | 8           | 0.001    | 4              | 0       | 0.853                          | 0.8     | 0.72                          | 0.641   |
| 15            | 8           | 1.00E-04 | 4              | 0       | 0.854                          | 0.8     | 0.726                         | 0.648   |
| 16            | 8           | 0.005    | 4              | 0.1     | 0.854                          | 0.794   | 0.739                         | 0.669   |
| 17            | 8           | 0.001    | 4              | 0.1     | 0.853                          | 0.788   | 0.739                         | 0.676   |
| 18            | 8           | 1.00E-04 | 4              | 0.1     | 0.852                          | 0.791   | 0.736                         | 0.666   |
| 19            | 8           | 0.005    | 4              | 0.2     | 0.849                          | 0.79    | 0.743                         | 0.678   |
| 20            | 8           | 0.001    | 4              | 0.2     | 0.849                          | 0.792   | 0.744                         | 0.67    |
| 21            | 8           | 1.00E-04 | 4              | 0.2     | 0.847                          | 0.792   | 0.742                         | 0.668   |
| 22            | 8           | 0.005    | 4              | 0.3     | 0.833                          | 0.756   | 0.735                         | 0.684   |
| 23            | 8           | 0.001    | 4              | 0.3     | 0.835                          | 0.777   | 0.742                         | 0.673   |
| 24            | 8           | 1.00E-04 | 4              | 0.3     | 0.836                          | 0.772   | 0.736                         | 0.675   |
| 25            | 8           | 0.005    | 3              | 0       | 0.849                          | 0.794   | 0.711                         | 0.638   |
| 26            | 8           | 0.001    | 3              | 0       | 0.847                          | 0.795   | 0.706                         | 0.62    |
| 27            | 8           | 1.00E-04 | 3              | 0       | 0.843                          | 0.789   | 0.703                         | 0.625   |
| 28            | 8           | 0.005    | 3              | 0.1     | 0.852                          | 0.799   | 0.738                         | 0.673   |
| 29            | 8           | 0.001    | 3              | 0.1     | 0.852                          | 0.794   | 0.737                         | 0.671   |
| 30            | 8           | 1.00E-04 | 3              | 0.1     | 0.851                          | 0.792   | 0.737                         | 0.663   |
| 31            | 8           | 0.005    | 3              | 0.2     | 0.843                          | 0.787   | 0.74                          | 0.679   |
| 32            | 8           | 0.001    | 3              | 0.2     | 0.841                          | 0.783   | 0.735                         | 0.678   |
| 33            | 8           | 1.00E-04 | 3              | 0.2     | 0.837                          | 0.767   | 0.734                         | 0.681   |
| 34            | 8           | 0.005    | 3              | 0.3     | 0.833                          | 0.77    | 0.74                          | 0.685   |
| 35            | 8           | 0.001    | 3              | 0.3     | 0.828                          | 0.761   | 0.73                          | 0.678   |
| 36            | 8           | 1.00E-04 | 3              | 0.3     | 0.827                          | 0.756   | 0.735                         | 0.683   |
| 37            | 8           | 0.005    | 2              | 0       | 0.85                           | 0.798   | 0.714                         | 0.639   |
| 38            | 8           | 0.001    | 2              | 0       | 0.849                          | 0.8     | 0.712                         | 0.619   |
| 39            | 8           | 1.00E-04 | 2              | 0       | 0.848                          | 0.8     | 0.709                         | 0.617   |
| 40            | 8           | 0.005    | 2              | 0.1     | 0.841                          | 0.748   | 0.726                         | 0.682   |

|           |          |                 |          |            |              |              |             |             |
|-----------|----------|-----------------|----------|------------|--------------|--------------|-------------|-------------|
| 41        | 8        | 0.001           | 2        | 0.1        | 0.844        | 0.78         | 0.724       | 0.663       |
| 42        | 8        | 1.00E-04        | 2        | 0.1        | 0.844        | 0.779        | 0.727       | 0.657       |
| 43        | 8        | 0.005           | 2        | 0.2        | 0.831        | 0.763        | 0.733       | 0.68        |
| 44        | 8        | 0.001           | 2        | 0.2        | 0.827        | 0.755        | 0.731       | 0.676       |
| 45        | 8        | 1.00E-04        | 2        | 0.2        | 0.828        | 0.758        | 0.73        | 0.677       |
| 46        | 8        | 0.005           | 2        | 0.3        | 0.809        | 0.764        | 0.725       | 0.67        |
| 47        | 8        | 0.001           | 2        | 0.3        | 0.808        | 0.758        | 0.73        | 0.67        |
| 48        | 8        | 1.00E-04        | 2        | 0.3        | 0.809        | 0.756        | 0.73        | 0.669       |
| 49        | 4        | 0.005           | 8        | 0          | 0.862        | 0.8          | 0.737       | 0.661       |
| 50        | 4        | 0.001           | 8        | 0          | 0.864        | 0.806        | 0.736       | 0.655       |
| 51        | 4        | 1.00E-04        | 8        | 0          | 0.864        | 0.804        | 0.734       | 0.653       |
| 52        | 4        | 0.005           | 8        | 0.1        | 0.852        | 0.798        | 0.754       | 0.658       |
| 53        | 4        | 0.001           | 8        | 0.1        | 0.856        | 0.802        | 0.742       | 0.649       |
| 54        | 4        | 1.00E-04        | 8        | 0.1        | 0.855        | 0.795        | 0.741       | 0.654       |
| 55        | 4        | 0.005           | 8        | 0.2        | 0.855        | 0.795        | 0.74        | 0.661       |
| 56        | 4        | 0.001           | 8        | 0.2        | 0.853        | 0.792        | 0.747       | 0.658       |
| 57        | 4        | 1.00E-04        | 8        | 0.2        | 0.855        | 0.798        | 0.751       | 0.65        |
| 58        | 4        | 0.005           | 8        | 0.3        | 0.845        | 0.784        | 0.748       | 0.661       |
| 59        | 4        | 0.001           | 8        | 0.3        | 0.844        | 0.786        | 0.743       | 0.654       |
| 60        | 4        | 1.00E-04        | 8        | 0.3        | 0.845        | 0.788        | 0.746       | 0.649       |
| 61        | 4        | 0.005           | 4        | 0          | 0.862        | 0.799        | 0.73        | 0.649       |
| 62        | 4        | 0.001           | 4        | 0          | 0.862        | 0.799        | 0.731       | 0.642       |
| 63        | 4        | 1.00E-04        | 4        | 0          | 0.861        | 0.802        | 0.725       | 0.637       |
| 64        | 4        | 0.005           | 4        | 0.1        | 0.854        | 0.8          | 0.742       | 0.657       |
| 65        | 4        | 0.001           | 4        | 0.1        | 0.856        | 0.802        | 0.744       | 0.649       |
| <b>66</b> | <b>4</b> | <b>1.00E-04</b> | <b>4</b> | <b>0.1</b> | <b>0.851</b> | <b>0.793</b> | <b>0.74</b> | <b>0.65</b> |
| 67        | 4        | 0.005           | 4        | 0.2        | 0.847        | 0.774        | 0.739       | 0.692       |
| 68        | 4        | 0.001           | 4        | 0.2        | 0.844        | 0.781        | 0.742       | 0.661       |
| 69        | 4        | 1.00E-04        | 4        | 0.2        | 0.846        | 0.787        | 0.742       | 0.663       |
| 70        | 4        | 0.005           | 4        | 0.3        | 0.835        | 0.777        | 0.743       | 0.665       |
| 71        | 4        | 0.001           | 4        | 0.3        | 0.835        | 0.78         | 0.735       | 0.661       |
| 72        | 4        | 1.00E-04        | 4        | 0.3        | 0.833        | 0.776        | 0.742       | 0.663       |
| 73        | 4        | 0.005           | 3        | 0          | 0.848        | 0.793        | 0.698       | 0.63        |
| 74        | 4        | 0.001           | 3        | 0          | 0.85         | 0.796        | 0.708       | 0.621       |
| 75        | 4        | 1.00E-04        | 3        | 0          | 0.85         | 0.793        | 0.707       | 0.624       |
| 76        | 4        | 0.005           | 3        | 0.1        | 0.849        | 0.796        | 0.74        | 0.67        |
| 77        | 4        | 0.001           | 3        | 0.1        | 0.848        | 0.797        | 0.733       | 0.658       |
| 78        | 4        | 1.00E-04        | 3        | 0.1        | 0.847        | 0.793        | 0.734       | 0.656       |
| 79        | 4        | 0.005           | 3        | 0.2        | 0.835        | 0.764        | 0.732       | 0.677       |
| 80        | 4        | 0.001           | 3        | 0.2        | 0.836        | 0.78         | 0.737       | 0.669       |
| 81        | 4        | 1.00E-04        | 3        | 0.2        | 0.834        | 0.773        | 0.737       | 0.668       |
| 82        | 4        | 0.005           | 3        | 0.3        | 0.825        | 0.765        | 0.734       | 0.673       |
| 83        | 4        | 0.001           | 3        | 0.3        | 0.822        | 0.764        | 0.731       | 0.67        |
| 84        | 4        | 1.00E-04        | 3        | 0.3        | 0.822        | 0.766        | 0.734       | 0.668       |
| 85        | 4        | 0.005           | 2        | 0          | 0.847        | 0.802        | 0.708       | 0.627       |

|     |   |          |   |     |       |       |       |       |
|-----|---|----------|---|-----|-------|-------|-------|-------|
| 86  | 4 | 0.001    | 2 | 0   | 0.846 | 0.801 | 0.705 | 0.619 |
| 87  | 4 | 1.00E-04 | 2 | 0   | 0.845 | 0.8   | 0.704 | 0.622 |
| 88  | 4 | 0.005    | 2 | 0.1 | 0.843 | 0.775 | 0.735 | 0.656 |
| 89  | 4 | 0.001    | 2 | 0.1 | 0.842 | 0.781 | 0.732 | 0.658 |
| 90  | 4 | 1.00E-04 | 2 | 0.1 | 0.845 | 0.788 | 0.733 | 0.65  |
| 91  | 4 | 0.005    | 2 | 0.2 | 0.831 | 0.767 | 0.734 | 0.669 |
| 92  | 4 | 0.001    | 2 | 0.2 | 0.827 | 0.762 | 0.73  | 0.66  |
| 93  | 4 | 1.00E-04 | 2 | 0.2 | 0.825 | 0.766 | 0.73  | 0.658 |
| 94  | 4 | 0.005    | 2 | 0.3 | 0.803 | 0.738 | 0.725 | 0.671 |
| 95  | 4 | 0.001    | 2 | 0.3 | 0.801 | 0.738 | 0.722 | 0.666 |
| 96  | 4 | 1.00E-04 | 2 | 0.3 | 0.799 | 0.733 | 0.722 | 0.663 |
| 97  | 3 | 0.005    | 8 | 0   | 0.866 | 0.803 | 0.744 | 0.653 |
| 98  | 3 | 0.001    | 8 | 0   | 0.866 | 0.806 | 0.737 | 0.641 |
| 99  | 3 | 1.00E-04 | 8 | 0   | 0.865 | 0.806 | 0.735 | 0.64  |
| 100 | 3 | 0.005    | 8 | 0.1 | 0.858 | 0.803 | 0.746 | 0.667 |
| 101 | 3 | 0.001    | 8 | 0.1 | 0.856 | 0.8   | 0.748 | 0.669 |
| 102 | 3 | 1.00E-04 | 8 | 0.1 | 0.853 | 0.791 | 0.743 | 0.656 |
| 103 | 3 | 0.005    | 8 | 0.2 | 0.856 | 0.797 | 0.75  | 0.667 |
| 104 | 3 | 0.001    | 8 | 0.2 | 0.852 | 0.795 | 0.748 | 0.659 |
| 105 | 3 | 1.00E-04 | 8 | 0.2 | 0.855 | 0.799 | 0.748 | 0.654 |
| 106 | 3 | 0.005    | 8 | 0.3 | 0.843 | 0.781 | 0.748 | 0.66  |
| 107 | 3 | 0.001    | 8 | 0.3 | 0.847 | 0.79  | 0.749 | 0.648 |
| 108 | 3 | 1.00E-04 | 8 | 0.3 | 0.847 | 0.794 | 0.749 | 0.651 |
| 109 | 3 | 0.005    | 4 | 0   | 0.859 | 0.794 | 0.737 | 0.656 |
| 110 | 3 | 0.001    | 4 | 0   | 0.861 | 0.803 | 0.73  | 0.644 |
| 111 | 3 | 1.00E-04 | 4 | 0   | 0.862 | 0.806 | 0.732 | 0.638 |
| 112 | 3 | 0.005    | 4 | 0.1 | 0.855 | 0.801 | 0.749 | 0.667 |
| 113 | 3 | 0.001    | 4 | 0.1 | 0.851 | 0.796 | 0.746 | 0.669 |
| 114 | 3 | 1.00E-04 | 4 | 0.1 | 0.855 | 0.801 | 0.746 | 0.662 |
| 115 | 3 | 0.005    | 4 | 0.2 | 0.848 | 0.792 | 0.745 | 0.669 |
| 116 | 3 | 0.001    | 4 | 0.2 | 0.846 | 0.794 | 0.75  | 0.667 |
| 117 | 3 | 1.00E-04 | 4 | 0.2 | 0.845 | 0.791 | 0.746 | 0.669 |
| 118 | 3 | 0.005    | 4 | 0.3 | 0.835 | 0.78  | 0.744 | 0.662 |
| 119 | 3 | 0.001    | 4 | 0.3 | 0.832 | 0.779 | 0.743 | 0.67  |
| 120 | 3 | 1.00E-04 | 4 | 0.3 | 0.828 | 0.777 | 0.736 | 0.668 |
| 121 | 3 | 0.005    | 3 | 0   | 0.857 | 0.796 | 0.727 | 0.66  |
| 122 | 3 | 0.001    | 3 | 0   | 0.859 | 0.805 | 0.725 | 0.641 |
| 123 | 3 | 1.00E-04 | 3 | 0   | 0.856 | 0.798 | 0.727 | 0.641 |
| 124 | 3 | 0.005    | 3 | 0.1 | 0.851 | 0.797 | 0.747 | 0.663 |
| 125 | 3 | 0.001    | 3 | 0.1 | 0.849 | 0.788 | 0.745 | 0.666 |
| 126 | 3 | 1.00E-04 | 3 | 0.1 | 0.851 | 0.801 | 0.743 | 0.66  |
| 127 | 3 | 0.005    | 3 | 0.2 | 0.843 | 0.787 | 0.749 | 0.67  |
| 128 | 3 | 0.001    | 3 | 0.2 | 0.841 | 0.788 | 0.748 | 0.663 |
| 129 | 3 | 1.00E-04 | 3 | 0.2 | 0.842 | 0.792 | 0.747 | 0.659 |
| 130 | 3 | 0.005    | 3 | 0.3 | 0.825 | 0.766 | 0.743 | 0.666 |

|     |   |          |   |     |       |       |       |       |
|-----|---|----------|---|-----|-------|-------|-------|-------|
| 131 | 3 | 0.001    | 3 | 0.3 | 0.825 | 0.77  | 0.74  | 0.65  |
| 132 | 3 | 1.00E-04 | 3 | 0.3 | 0.828 | 0.776 | 0.742 | 0.655 |
| 133 | 3 | 0.005    | 2 | 0   | 0.851 | 0.797 | 0.716 | 0.63  |
| 134 | 3 | 0.001    | 2 | 0   | 0.846 | 0.796 | 0.708 | 0.618 |
| 135 | 3 | 1.00E-04 | 2 | 0   | 0.848 | 0.794 | 0.712 | 0.628 |
| 136 | 3 | 0.005    | 2 | 0.1 | 0.848 | 0.781 | 0.739 | 0.664 |
| 137 | 3 | 0.001    | 2 | 0.1 | 0.846 | 0.783 | 0.738 | 0.658 |
| 138 | 3 | 1.00E-04 | 2 | 0.1 | 0.846 | 0.784 | 0.737 | 0.667 |
| 139 | 3 | 0.005    | 2 | 0.2 | 0.834 | 0.78  | 0.744 | 0.662 |
| 140 | 3 | 0.001    | 2 | 0.2 | 0.83  | 0.772 | 0.737 | 0.661 |
| 141 | 3 | 1.00E-04 | 2 | 0.2 | 0.83  | 0.765 | 0.734 | 0.66  |
| 142 | 3 | 0.005    | 2 | 0.3 | 0.807 | 0.743 | 0.731 | 0.666 |
| 143 | 3 | 0.001    | 2 | 0.3 | 0.806 | 0.742 | 0.726 | 0.667 |
| 144 | 3 | 1.00E-04 | 2 | 0.3 | 0.802 | 0.736 | 0.723 | 0.662 |
| 145 | 2 | 0.005    | 8 | 0   | 0.862 | 0.798 | 0.741 | 0.659 |
| 146 | 2 | 0.001    | 8 | 0   | 0.864 | 0.805 | 0.734 | 0.638 |
| 147 | 2 | 1.00E-04 | 8 | 0   | 0.863 | 0.802 | 0.739 | 0.642 |
| 148 | 2 | 0.005    | 8 | 0.1 | 0.857 | 0.802 | 0.748 | 0.65  |
| 149 | 2 | 0.001    | 8 | 0.1 | 0.858 | 0.8   | 0.748 | 0.651 |
| 150 | 2 | 1.00E-04 | 8 | 0.1 | 0.855 | 0.799 | 0.746 | 0.657 |
| 151 | 2 | 0.005    | 8 | 0.2 | 0.853 | 0.79  | 0.748 | 0.659 |
| 152 | 2 | 0.001    | 8 | 0.2 | 0.855 | 0.796 | 0.75  | 0.655 |
| 153 | 2 | 1.00E-04 | 8 | 0.2 | 0.852 | 0.799 | 0.746 | 0.653 |
| 154 | 2 | 0.005    | 8 | 0.3 | 0.846 | 0.784 | 0.748 | 0.645 |
| 155 | 2 | 0.001    | 8 | 0.3 | 0.843 | 0.782 | 0.75  | 0.636 |
| 156 | 2 | 1.00E-04 | 8 | 0.3 | 0.847 | 0.788 | 0.749 | 0.638 |
| 157 | 2 | 0.005    | 4 | 0   | 0.861 | 0.8   | 0.732 | 0.654 |
| 158 | 2 | 0.001    | 4 | 0   | 0.861 | 0.806 | 0.732 | 0.649 |
| 159 | 2 | 1.00E-04 | 4 | 0   | 0.86  | 0.805 | 0.729 | 0.643 |
| 160 | 2 | 0.005    | 4 | 0.1 | 0.85  | 0.789 | 0.741 | 0.664 |
| 161 | 2 | 0.001    | 4 | 0.1 | 0.855 | 0.804 | 0.74  | 0.66  |
| 162 | 2 | 1.00E-04 | 4 | 0.1 | 0.853 | 0.8   | 0.741 | 0.66  |
| 163 | 2 | 0.005    | 4 | 0.2 | 0.842 | 0.786 | 0.74  | 0.66  |
| 164 | 2 | 0.001    | 4 | 0.2 | 0.839 | 0.772 | 0.737 | 0.649 |
| 165 | 2 | 1.00E-04 | 4 | 0.2 | 0.844 | 0.791 | 0.744 | 0.644 |
| 166 | 2 | 0.005    | 4 | 0.3 | 0.832 | 0.778 | 0.742 | 0.656 |
| 167 | 2 | 0.001    | 4 | 0.3 | 0.829 | 0.773 | 0.736 | 0.64  |
| 168 | 2 | 1.00E-04 | 4 | 0.3 | 0.829 | 0.775 | 0.737 | 0.653 |
| 169 | 2 | 0.005    | 3 | 0   | 0.857 | 0.806 | 0.716 | 0.625 |
| 170 | 2 | 0.001    | 3 | 0   | 0.852 | 0.8   | 0.712 | 0.623 |
| 171 | 2 | 1.00E-04 | 3 | 0   | 0.851 | 0.801 | 0.707 | 0.613 |
| 172 | 2 | 0.005    | 3 | 0.1 | 0.849 | 0.801 | 0.756 | 0.661 |
| 173 | 2 | 0.001    | 3 | 0.1 | 0.855 | 0.801 | 0.741 | 0.655 |
| 174 | 2 | 1.00E-04 | 3 | 0.1 | 0.855 | 0.8   | 0.742 | 0.66  |
| 175 | 2 | 0.005    | 3 | 0.2 | 0.841 | 0.785 | 0.752 | 0.665 |

---

|     |   |          |   |     |       |       |       |       |
|-----|---|----------|---|-----|-------|-------|-------|-------|
| 176 | 2 | 0.001    | 3 | 0.2 | 0.838 | 0.785 | 0.744 | 0.661 |
| 177 | 2 | 1.00E-04 | 3 | 0.2 | 0.841 | 0.785 | 0.746 | 0.665 |
| 178 | 2 | 0.005    | 3 | 0.3 | 0.819 | 0.767 | 0.737 | 0.654 |
| 179 | 2 | 0.001    | 3 | 0.3 | 0.819 | 0.767 | 0.733 | 0.647 |
| 180 | 2 | 1.00E-04 | 3 | 0.3 | 0.819 | 0.766 | 0.74  | 0.652 |
| 181 | 2 | 0.005    | 2 | 0   | 0.844 | 0.799 | 0.693 | 0.615 |
| 182 | 2 | 0.001    | 2 | 0   | 0.846 | 0.799 | 0.706 | 0.618 |
| 183 | 2 | 1.00E-04 | 2 | 0   | 0.846 | 0.799 | 0.705 | 0.615 |
| 184 | 2 | 0.005    | 2 | 0.1 | 0.838 | 0.783 | 0.723 | 0.663 |
| 185 | 2 | 0.001    | 2 | 0.1 | 0.841 | 0.792 | 0.72  | 0.649 |
| 186 | 2 | 1.00E-04 | 2 | 0.1 | 0.837 | 0.789 | 0.717 | 0.643 |
| 187 | 2 | 0.005    | 2 | 0.2 | 0.824 | 0.768 | 0.718 | 0.66  |
| 188 | 2 | 0.001    | 2 | 0.2 | 0.821 | 0.772 | 0.719 | 0.652 |
| 189 | 2 | 1.00E-04 | 2 | 0.2 | 0.822 | 0.773 | 0.723 | 0.659 |
| 190 | 2 | 0.005    | 2 | 0.3 | 0.803 | 0.755 | 0.715 | 0.652 |
| 191 | 2 | 0.001    | 2 | 0.3 | 0.793 | 0.741 | 0.707 | 0.649 |
| 192 | 2 | 1.00E-04 | 2 | 0.3 | 0.798 | 0.749 | 0.713 | 0.649 |

---

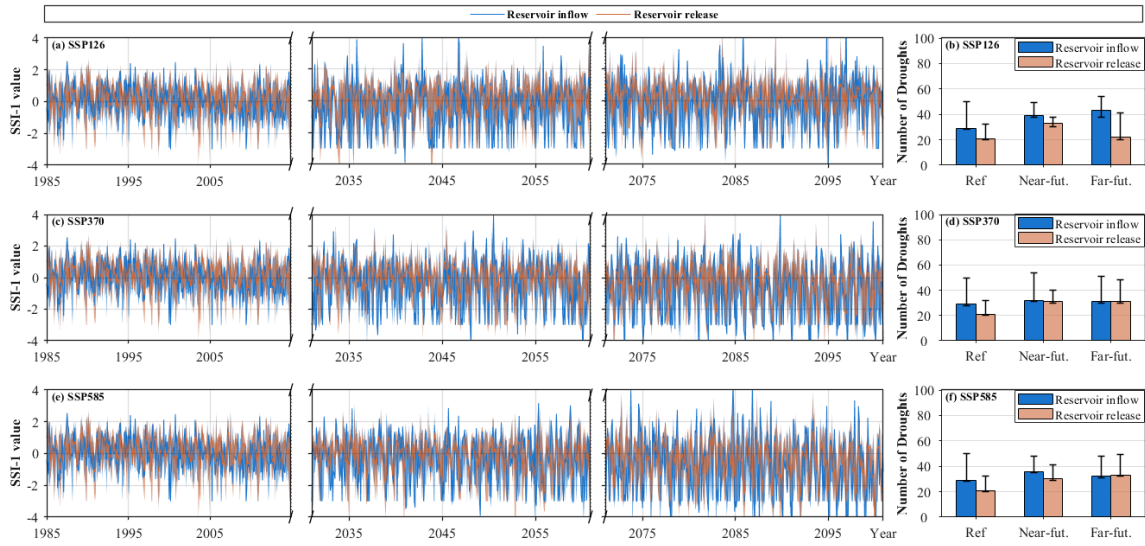

**Figure S1.** Hydrological drought SSI-1 for reference and future periods over the UHRB. (a) Time series of SSI-1 associated with reservoir inflow and release for the low-emission SSP126 scenario. Blue and orange intervals indicate their uncertainties, respectively. (b) Number of drought events for the reference period (1985–2014), near-future period (2031–2060), and far-future period (2071–2100). Colored bars are ensemble means and error bars represent the estimated difference in the number of drought events among the five GCMs. Panels (c,d) and (e,f) are the same as panels (a,b), but for the medium-emission SSP370 and high-emission SSP585 scenarios, respectively.

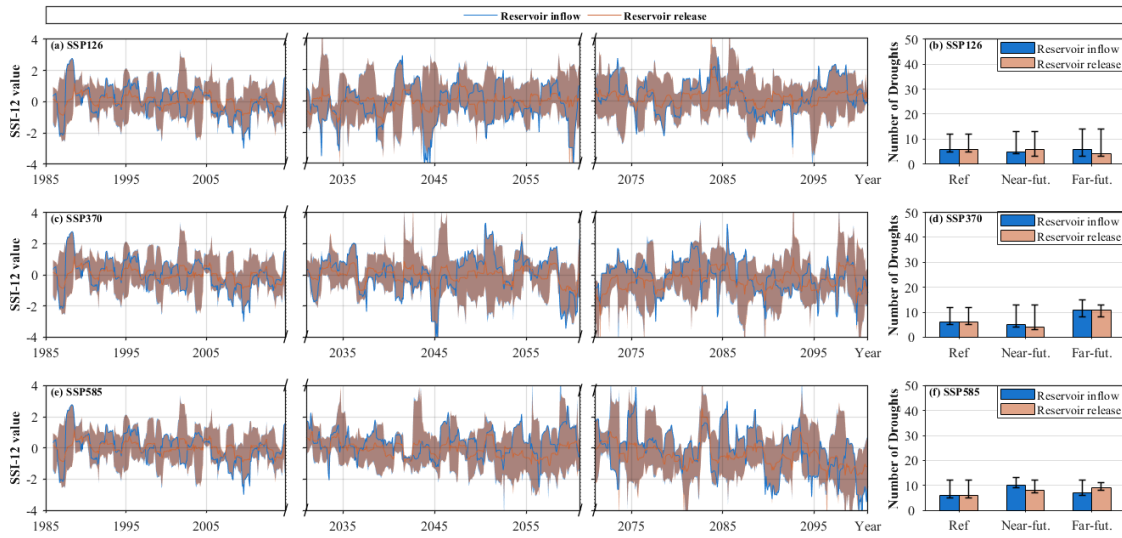

**Figure S2.** Hydrological drought SSI-12 for reference and future periods over the UHRB. (a) Time series of SSI-12 associated with reservoir inflow and release for the low-emission SSP126 scenario. Blue and orange intervals indicate their uncertainties, respectively. (b) Number of drought events for the reference period (1985–2014), near-future period (2031–2060), and far-future period (2071–2100). Colored bars are ensemble means and error bars represent the estimated difference in the number of drought events among the five GCMs. Panels (c,d) and (e,f) are the same as panels (a,b), but for the medium-emission SSP370 and high-emission SSP585 scenarios, respectively.

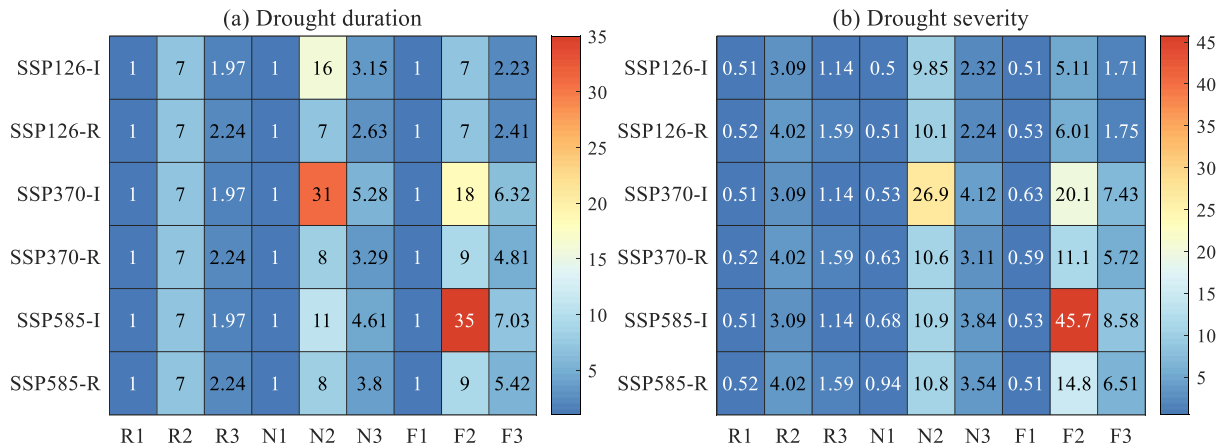

**Figure S3.** Heat map representation of (a) drought duration and (b) drought severity for the GCM-averaged SSI-1 series. The symbols R1, R2 and R3 indicate the minimum, maximum, and mean values during the reference period (1985–2014). N1, N2 and N3 are the same, but for the near-future period (2031–2060). F1, F2, and F3 are for the far-future period (2071–2100). Additionally, SSP126-I and SSP126-R are associated with reservoir inflow and release in the SSP126 scenario, SSP370-I and SSP370-R with the SSP370 scenario, and SSP585-I and SSP585-R with the SSP585 scenario.

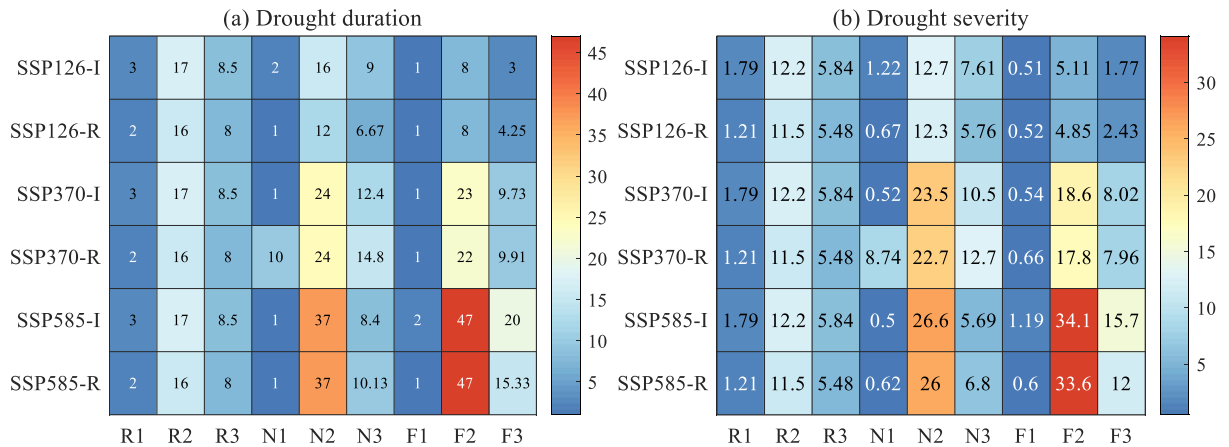

**Figure S4.** Heat map representation of (a) drought duration and (b) drought severity for the GCM-averaged SSI-12 series. The symbols R1, R2 and R3 indicate the minimum, maximum, and mean values during the reference period (1985–2014). N1, N2 and N3 are the same, but for the near-future period (2031–2060). F1, F2, and F3 are for the far-future period (2071–2100). Additionally, SSP126-I and SSP126-R are associated with reservoir inflow and release in the SSP126 scenario, SSP370-I and SSP370-R with the SSP370 scenario, and SSP585-I and SSP585-R with the SSP585 scenario.

## Acronyms and Notation

For ease of reading, all important and notations in the main text are summarized below.

### Acronyms

|          |                                                        |
|----------|--------------------------------------------------------|
| UHRB     | Upper Hanjiang River Basin                             |
| SSI      | Standard Streamflow Index                              |
| LSTM     | Long and Short-Term Memory                             |
| GCM      | Global Climate Model                                   |
| SSP      | Shared Socioeconomic Pathway                           |
| ML       | Machine Learning                                       |
| CMA      | China Meteorological Administration                    |
| ISIMIP3b | Inter-sectoral Impact Model Intercomparison Project 3b |
| NSGA-III | Nondominated sorting genetic algorithm version III     |
| FDC      | Flow Duration Curve                                    |
| NSE      | Nash–Sutcliffe efficiency                              |

### Notation for key variables

|                  |                                  |
|------------------|----------------------------------|
| $f$              | Operating objective vector       |
| $\pi_{\theta}^*$ | Optimal operating policies       |
| $w^H$            | Historical climate conditions    |
| $V$              | Reservoir storage                |
| $I$              | Reservoir inflow                 |
| $O$              | Reservoir release                |
| $D$              | Duration of hydrological drought |
| $S$              | Severity of hydrological drought |

## References

- Chen, X., Xu, B., Zheng, Y., and Zhang, C.: Nexus of water, energy and ecosystems in the upper Mekong River: A system analysis of phosphorus transport through cascade reservoirs, *Sci Total Environ*, 671, 1179-1191, 10.1016/j.scitotenv.2019.03.324, 2019.
- Deb, K., Pratap, A., Agarwal, S., and Meyarivan, T.: A fast and elitist multiobjective genetic algorithm: NSGA-II, *Ieee T Evolut Comput*, 6, 182-197, 10.1109/4235.996017, 2002.
- Li, X., Liu, P., Wang, Y., Yang, Z., Gong, Y., An, R., Huang, K., and Wen, Y.: Derivation of operating rule curves for cascade hydropower reservoirs considering the spot market: A case study of the China's Qing River cascade-reservoir system, *Renewable Energy*, 182, 1028-1038, 10.1016/j.renene.2021.11.013, 2022.
- Quinn, J. D., Reed, P. M., Giuliani, M., and Castelletti, A.: Rival framings: A framework for discovering how problem formulation uncertainties shape risk management trade - offs in water resources systems, *Water Resour Res*, 53, 7208-7233, 10.1002/2017wr020524, 2017.
- Si, Y., Li, X., Yin, D., Liu, R., Wei, J., Huang, Y., Li, T., Liu, J., Gu, S., and Wang, G.: Evaluating and optimizing the operation of the hydropower system in the Upper Yellow River: A general LINGO-based integrated framework, *Plos One*, 13, e0191483, 10.1371/journal.pone.0191483, 2018.
- Yang, G., Guo, S. L., Liu, P., and Block, P.: Integration and evaluation of forecast-informed multiobjective reservoir operations, *J Water Res Plan Man*, 146, 04020038, 10.1061/(Asce)Wr.1943-5452.0001229, 2020.
- Yang, G., Guo, S. L., Liu, P., Li, L. P., and Xu, C. Y.: Multiobjective reservoir operating rules based on cascade reservoir input variable selection method, *Water Resour Res*, 53, 3446-3463, 10.1002/2016wr020301, 2017.
